# Supplementary material for: A Highly Homogeneous Airborne Fungal Community around a Copper Open Pit Mine Reveals the Poor Contribution Made by the Local Aerosolization of Particles
Source: MDPI journal article supplement (doi:10.3390/microorganisms12050934), 2024-05-04
Supplement: s1 [file s1]

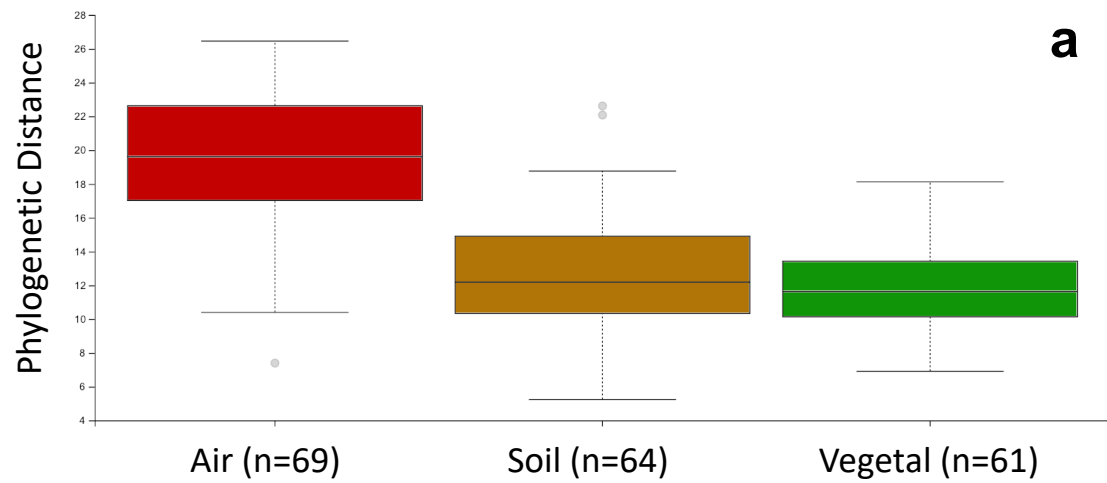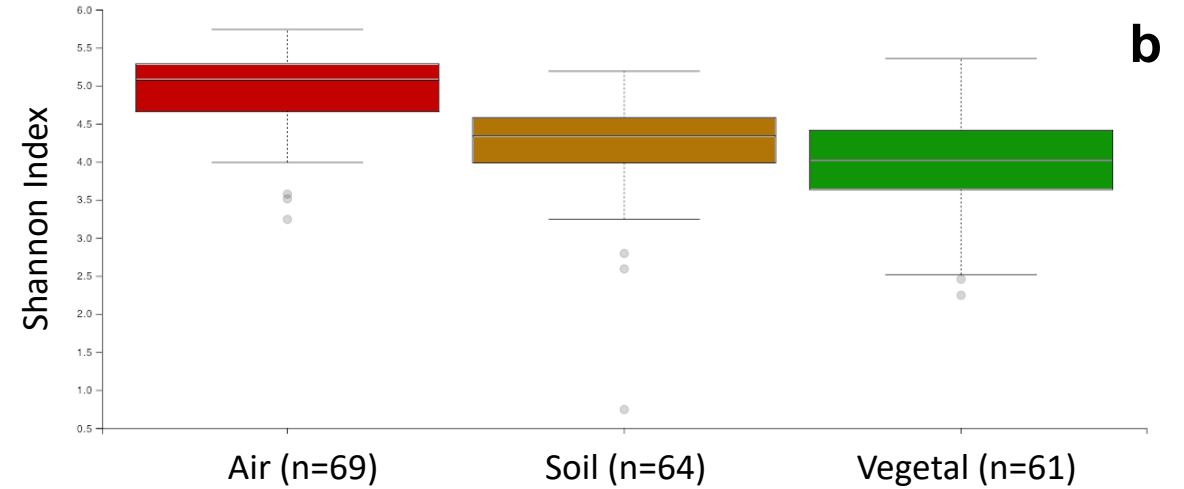

**Figure S1.** Alpha-diversity of the three communities: air (red), soil (brown) and vegetal detritus (green). The median is depicted in the center of each box. Similar to richness in Figure 2, Faith's phylogenetic diversity (**a**) and Shannon index (**b**) yielded similar results: air is more diverse than soil and vegetal debris.
