# Supplementary material for: A Highly Homogeneous Airborne Fungal Community around a Copper Open Pit Mine Reveals the Poor Contribution Made by the Local Aerosolization of Particles
Source: MDPI journal article supplement (doi:10.3390/microorganisms12050934), 2024-05-04
Supplement: s1 [file s1]

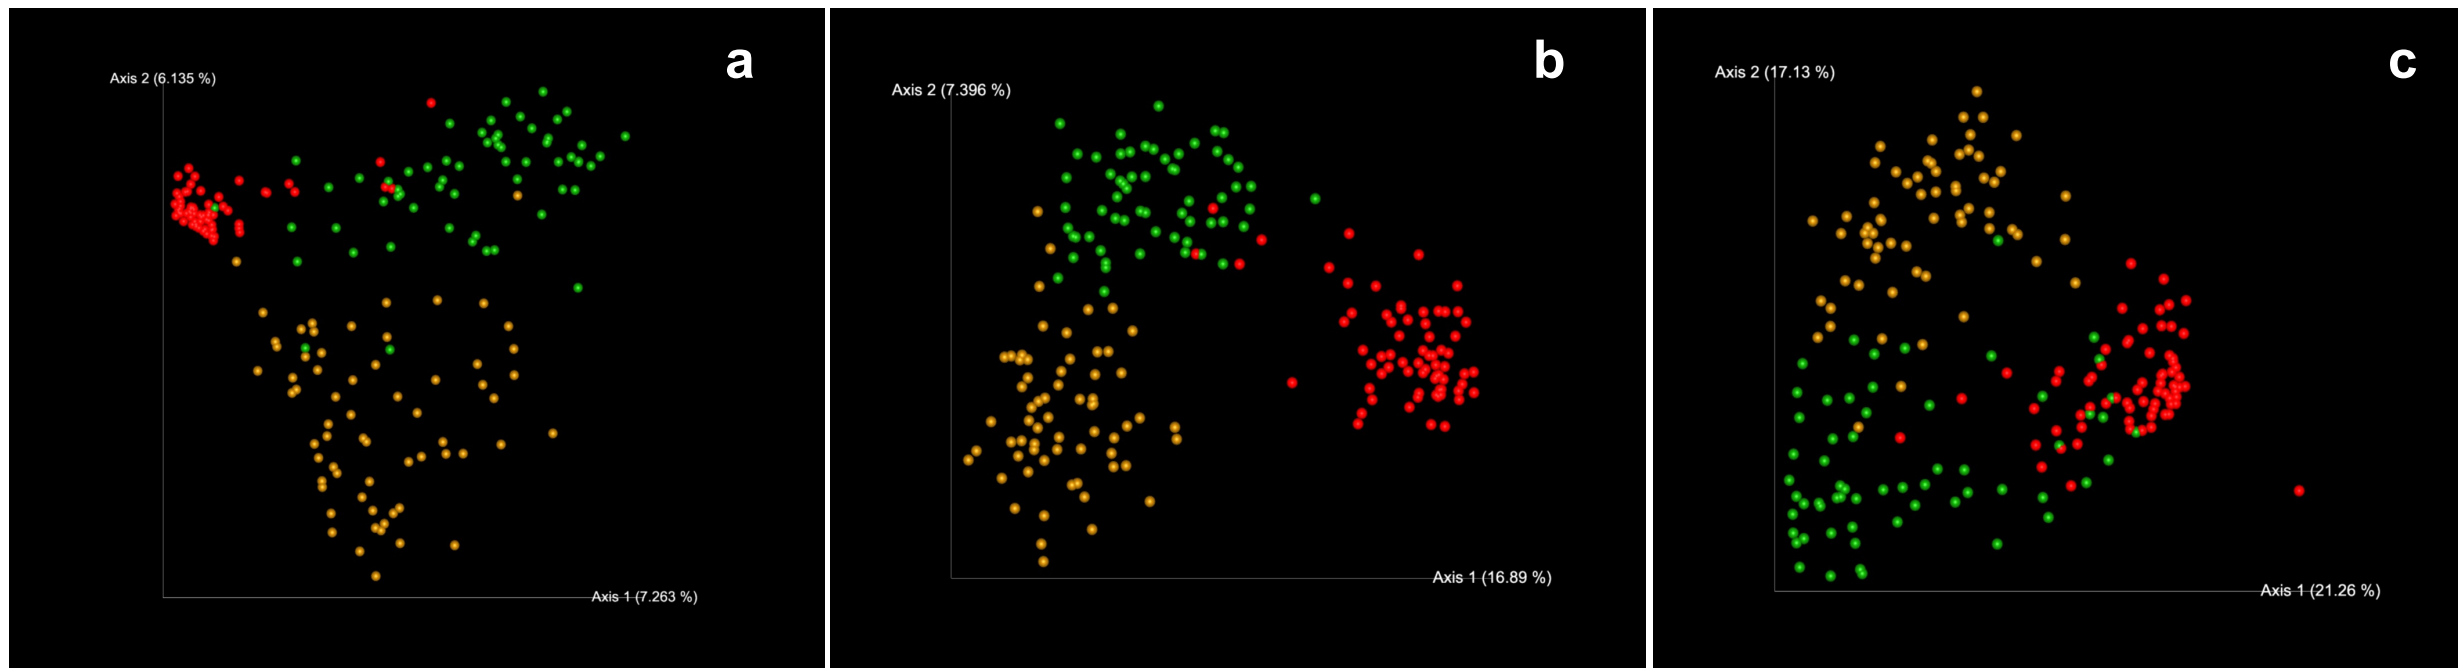

**Figure S2.** Principal coordinates plots of beta-diversity. The three communities are colored as the central figures: air (red), soil (brown) , and vegetal detritus (green). **a)** Bray-Curtis dissimilarity, **b)** Unweighted UniFrac, **c)** Weighted UniFrac.
