# Supplementary material for: A Highly Homogeneous Airborne Fungal Community around a Copper Open Pit Mine Reveals the Poor Contribution Made by the Local Aerosolization of Particles
Source: Microorganisms. 2024 May 4;12(5):934. doi: 10.3390/microorganisms12050934 (PMC11123957; doi:10.3390/microorganisms12050934)
Supplement: Supplementary file 1 [file microorganisms-12-00934-s001.zip]

Archive with 8 entries (8 files):
- Fuentes_et.al_Fig_S1.pdf
- __MACOSX/._Fuentes_et.al_Fig_S1.pdf
- Fuentes_et.al_Fig_S2.pdf
- __MACOSX/._Fuentes_et.al_Fig_S2.pdf
- Fuentes_et.al_Fig_S3.pdf
- __MACOSX/._Fuentes_et.al_Fig_S3.pdf
- Fuentes_et.al_TableS1.xlsx
- Fuentes_et.al_TableS2.xlsx
