# Supplementary material for: A Highly Homogeneous Airborne Fungal Community around a Copper Open Pit Mine Reveals the Poor Contribution Made by the Local Aerosolization of Particles
Source: Microorganisms. 2024 May 4;12(5):934. doi: 10.3390/microorganisms12050934 (PMC11123957; doi:10.3390/microorganisms12050934)
Supplement: Supplementary file 1 [file microorganisms-12-00934-s001.zip › Fuentes_et.al_TableS2.xlsx]

## Sheet: Beta-correlation
Variable (unit)		Air	Soil	Veg	q-value <0.001
Altitude	Jaccard	0.1468	0.2790	0.4523
(m.a.s.l.)	unweighted UniFrac	0.1367	0.1835	0.3976
	Bray-Curtis	0.1769	0.1630	0.2505
	weighted UniFrac	n.s.	n.s.	0.3121
Distance to mine	Jaccard	n.s.	n.s.	0.3240
(km)	unweighted UniFrac	n.s.	n.s.	0.2838
	Bray-Curtis	n.s.	n.s.	0.2800
	weighted UniFrac	n.s.	n.s.	0.3071
Humidity	Jaccard	n.s.
(%)	unweighted UniFrac	n.s.
	Bray-Curtis	n.s.
	weighted UniFrac	0.2523
Pressure	Jaccard	0.1527
(mmHg)	unweighted UniFrac	0.1302
	Bray-Curtis	0.1929
	weighted UniFrac	n.s.
Solar radiation	Jaccard	n.s.
(W/m2)	unweighted UniFrac	n.s.
	Bray-Curtis	n.s.
	weighted UniFrac	n.s.
Temperature	Jaccard	n.s.
(°C)	unweighted UniFrac	n.s.
	Bray-Curtis	n.s.
	weighted UniFrac	n.s.
UV dose	Jaccard	n.s.
(MEDs)	unweighted UniFrac	n.s.
	Bray-Curtis	n.s.
	weighted UniFrac	n.s.
Aluminium	Jaccard		n.s.
(mg/kg soil)	unweighted UniFrac		n.s.
	Bray-Curtis		n.s.
	weighted UniFrac		n.s.
Copper	Jaccard		n.s.
(mg/kg soil)	unweighted UniFrac		n.s.
	Bray-Curtis		n.s.
	weighted UniFrac		n.s.
Iron	Jaccard		n.s.
(mg/kg soil)	unweighted UniFrac		n.s.
	Bray-Curtis		n.s.
	weighted UniFrac		n.s.
Lead	Jaccard		n.s.
(mg/kg soil)	unweighted UniFrac		n.s.
	Bray-Curtis		n.s.
	weighted UniFrac		n.s.
Mercury	Jaccard		n.s.
(mg/kg soil)	unweighted UniFrac		n.s.
	Bray-Curtis		n.s.
	weighted UniFrac		n.s.
Zinc	Jaccard		n.s.
(mg/kg soil)	unweighted UniFrac		n.s.
	Bray-Curtis		n.s.
	weighted UniFrac		n.s.

## Sheet: Hoja1
	Variable	Beta-distance metric	Air	Soil	Veg
	Altitude (m.a.s.l.)	Jaccard	0.1468	0.2790	0.4523
		unweighted UniFrac	0.1367	0.1835	0.3976
	Distance to mine (km)	Jaccard	n.s.	n.s.	0.3240
		unweighted UniFrac	n.s.	n.s.	0.2838
	Pressure (mmHg)	Jaccard	0.1527	n.s.	n.s.
		unweighted UniFrac	0.1302	n.s.	n.s.
